# Supplementary material for: High-Throughput Sequencing to Identify Mutations Associated with Retinal Dystrophies
Source: MDPI journal article supplement (doi:10.3390/genes12081269), 2021-08-20
Supplement: s1 [file s1]

**Table S1. Clinical data of patients diagnosed with STGD or with the differential diagnosis of STGD.**

| P<br>a<br>t<br>i<br>e<br>n<br>t<br><br>I<br>D | Diag<br>nosis | Age<br>onset | Severit<br>y | Visual acuity<br>details                                                                                                                                                                                                                                                                                                   | Best-corrected Visual<br>Acuity (LogMAR) |     | Tension               | Fundus<br>autofluoresce<br>nce (FAF)                                                                                                                                      | Autofluorescenc<br>e and deposits<br>(Severity)                             | optical<br>coherence<br>tomography<br>(OCT)                                                                                                      | central<br>macular<br>thicknes<br>s | macular<br>volume   | Electroretinogram<br>m (ERG)                                                                                                     | Fluorescei<br>n<br>angiograph<br>y      | Color<br>vision                    | Goldmann Visual                        | Others |
|-----------------------------------------------|---------------|--------------|--------------|----------------------------------------------------------------------------------------------------------------------------------------------------------------------------------------------------------------------------------------------------------------------------------------------------------------------------|------------------------------------------|-----|-----------------------|---------------------------------------------------------------------------------------------------------------------------------------------------------------------------|-----------------------------------------------------------------------------|--------------------------------------------------------------------------------------------------------------------------------------------------|-------------------------------------|---------------------|----------------------------------------------------------------------------------------------------------------------------------|-----------------------------------------|------------------------------------|----------------------------------------|--------|
|                                               |               |              |              |                                                                                                                                                                                                                                                                                                                            | OD                                       | OS  |                       |                                                                                                                                                                           |                                                                             |                                                                                                                                                  |                                     |                     |                                                                                                                                  |                                         |                                    |                                        |        |
| 0<br>0<br>8                                   | CRD           | 45           | severe       | progressive<br>visual<br>impairment OU<br>(blurry vision)<br>over years,<br>central vision<br>distortion<br>including<br>metamorphopsi<br>a OU, night<br>vision problems,<br>reduced<br>contrast<br>sensitivity,<br>glare, no color<br>vision problems<br>besides<br>inherited<br>protanopic color<br>vision<br>deficiency | 0.1                                      | 0.1 | 16mmHg/16<br>mmHg     | bilateral finely<br>speckled<br>hypoautofluore<br>scent spots,<br>adjacent<br>hyperautofluor<br>escent rim,<br>(para-)central<br>retinal atrophy,<br>OS foveal<br>sparing | deposits none,<br>atrophy medium                                            | bilateral (para-<br>)central lesions,<br>cRORA, OD<br>ORTs, OS foveal<br>sparing, iRORA<br>and retinal thinning<br>up to the vascular<br>arcades | 177µm/23<br>1µm                     | 6.21mm³/6.40m<br>m³ | ffERG:<br><br>scotopic and<br>photopic amplitudes<br>slightly reduced<br>below normal values<br>(combined rod cone<br>dystrophy) | N/A                                     | mainly<br>protanopic<br>confusions | OD>OS concentric<br>scotoma            | N/A    |
| 0<br>1<br>7                                   | RP            | childhood    | severe       | Initial photopsia,<br>glare, night<br>vision problems,<br>reduced<br>contrast<br>sensitivity,<br>variable visual<br>impairment OU<br>(blurry vision)                                                                                                                                                                       | 0.1                                      | 0.1 | 14<br>mmHg/15<br>mmHg | bilateral<br>hypoautofluore<br>scent spots,<br>slight adjacent<br>diffuse<br>hyperautofluor<br>escence                                                                    | deposits none,<br>atrophy medium,<br>(small lesions,<br>great distribution) | bilateral indistinct<br>borders of atrophy,<br>mainly iRORA,<br>foveal sparing,<br>cystoid macular<br>edema                                      | 286µm/27<br>0µm                     | 7.55mm³/7.31m<br>m³ | ffERG:<br><br>reduced scotopic<br>and photopic<br>amplitudes, but near<br>to normal                                              | N/A                                     | inconspicuo<br>us                  | regular borders of<br>the visual field | N/A    |
| 0<br>1<br>9                                   | STG<br>D      | 20           | N/A          | Initial symptom:<br>Central                                                                                                                                                                                                                                                                                                | 0.8                                      | 1.2 | N/A                   | OD: Mild<br>perimacular                                                                                                                                                   | N/A                                                                         | OD:<br>Hyperreflective<br>and irregular<br>photoreceptor                                                                                         | 205µm/22<br>1µm                     | 8.42mm³<br>8.89mm³  | /N/A                                                                                                                             | OD: Mild<br>perimacular<br>staining, no | N/A                                | N/A                                    | N/A    |

|     |       |    |     |                                                                                                |                                                                                                                                                           |                                                                                                                                                           |                                                                                                 |                                                                                                                                    |     |                                                                                                                  |                                                             |                                                                      |     |                                                                            |     |     |                                                                                                                                   |
|-----|-------|----|-----|------------------------------------------------------------------------------------------------|-----------------------------------------------------------------------------------------------------------------------------------------------------------|-----------------------------------------------------------------------------------------------------------------------------------------------------------|-------------------------------------------------------------------------------------------------|------------------------------------------------------------------------------------------------------------------------------------|-----|------------------------------------------------------------------------------------------------------------------|-------------------------------------------------------------|----------------------------------------------------------------------|-----|----------------------------------------------------------------------------|-----|-----|-----------------------------------------------------------------------------------------------------------------------------------|
|     |       |    |     | Scotoma right eye in 2016                                                                      |                                                                                                                                                           |                                                                                                                                                           |                                                                                                 | autofluorescence with flecks                                                                                                       |     | inner/outer segment junction                                                                                     |                                                             |                                                                      |     | leakage, no dark choroid                                                   |     |     |                                                                                                                                   |
|     |       |    |     |                                                                                                |                                                                                                                                                           |                                                                                                                                                           |                                                                                                 | OS: Inconspicuous                                                                                                                  |     | OS: Dry neurosensory retinal layers                                                                              |                                                             |                                                                      |     | OS: Inconspicuous                                                          |     |     |                                                                                                                                   |
| 020 | MD    | 51 | N/A | No visual field defects in 2012                                                                | Date: Value<br>08/16: 0.05<br>05/16: 0.32<br>04/16: 0.4<br>02/16: 0.4<br>01/16: 0.5<br>12/15: 0.5<br>08/15: 0.5<br>05/15: 0.7<br>03/14: 0.8<br>03/11: 1.0 | Date: Value<br>08/16: 0.3<br>05/16: 0.32<br>04/16: 0.5<br>02/16: 0.4<br>01/16: 0.5<br>12/15: 0.5<br>08/15: 0.63<br>05/15: 0.7<br>03/14: 0.8<br>03/11: 1.0 | Date: Value<br>05/15: 18/19 mmHg<br>12/15: 20/20 mmHg<br>01/16: 22/22 mmHg<br>04/16: 16/16 mmHg | Central autofluorescence due to multiple Drusen (Drusen maculopathy)                                                               | N/A | OD: Numerous drusen especially centrally. Dry neurosensory retina<br>OS: Drusenoid pigment epithelial detachment | Date: Value<br>08/16: 170 um/489 um<br>06/15: 516 um/504 um | Date: Value<br>08/16: 8.63 mm³/10.65mm³<br>06/15: 10.68 mm³/10.69mm³ | N/A | OD: Intense staining, no leakage<br>OS: Intense staining, no leakage       | N/A | N/A | Alopecia, Fibromyalgia.<br><br>Does not look like classical Stargardt but something like Drusenoid maculopathy                    |
| 021 | STG D | 69 | N/A | Left Eye: Eccentric vision, subjective visual impairment left eye when presenting in Nov. 2015 | Hand movement                                                                                                                                             | Finger-counting                                                                                                                                           | N/A                                                                                             | Perifoveolar hyper-auto-fluorescence with flecks OS>OD, centrally no evaluation possible due to retinal pigment epithelial atrophy | N/A | Bilateral: Central pigment epithelial and central retinal atrophy                                                | 236um/227um                                                 | 5.77 mm³/6.23mm³                                                     | N/A | OD>OS dark choroid, centrally large RPE defects. Late staining, no leakage | N/A | N/A | Developed Myelodysplastic syndrome 04/2017.<br><br>Arterial hypertension, Cardiac arrhythmias, post stent operation, fibromyalgia |

|     |       |    |      |                                                                                                             |                                                |                          |               |                                                                                                                                                                                                   |                             |                                                                                                                                                                                                                                            |             |                    |                                                                                                 |                                                                             |                           |                                                                |                                                                     |
|-----|-------|----|------|-------------------------------------------------------------------------------------------------------------|------------------------------------------------|--------------------------|---------------|---------------------------------------------------------------------------------------------------------------------------------------------------------------------------------------------------|-----------------------------|--------------------------------------------------------------------------------------------------------------------------------------------------------------------------------------------------------------------------------------------|-------------|--------------------|-------------------------------------------------------------------------------------------------|-----------------------------------------------------------------------------|---------------------------|----------------------------------------------------------------|---------------------------------------------------------------------|
| 022 | STG D | 30 | N/A  | N/A                                                                                                         | 2015: 1/35 (Visual acuity chart)<br>2011: 0.05 | 2015: 1/35<br>2011: 0.05 | 18mmHg/19mmHg | Bilateral: Diffuse paracentral and midperipheral autofluorescence, central large RPE defects                                                                                                      | N/A                         | Bilateral: Central pigment epithelial and central retinal atrophy                                                                                                                                                                          | 132µm/70µm  | 4.39mm³/4.48mm³    | N/A                                                                                             | Bilateral: Dark choroid<br><br>Late-phase: Perimacular staining, no leakage | N/A                       | N/A                                                            | Hypertension, Diabetes II,                                          |
| 023 | STG D | 50 | Mild | metamorphopsia OD>OS, glare, progressive visual impairment OU (blurry vision), reduced contrast sensitivity | 0.22                                           | 0.22                     | 12mmHg/12mmHg | bilateral alterations of the retinal pigment epithelium (RPE) and circumscribed areas of paracentral retinal atrophy (foveal sparing), surrounding hypo- and hyperautofluorescent drusenoid spots | deposits low atrophy medium | circumscribed paracentral complete retinal pigment epithelium and outer retinal atrophy (cRORA), adjacent incomplete retinal pigment epithelium and outer retinal atrophy (iRORA), foveal sparing of RORA, degenerative intraretinal fluid | 266µm/304µm | 7.95mm³/8.08mm³    | mfERG: OD>OS reduced amplitudes in the central area, some artefacts                             | N/A                                                                         | inconspicuous (Panel D15) | regular borders of the visual field, OS (para-)central scotoma | N/A                                                                 |
| 024 | STG D | 50 | Mild | progressive paracentral scotoma OU, progressive visual impairment OU (blurry vision), metamorphopsia        | 0.1                                            | 0.22                     | 13mmHg/14mmHg | bilateral hyperautofluorescent macular and peripapillary spots, few spots of paracentral retinal atrophy (foveal sparing)                                                                         | deposits medium atrophy low | hyperreflective spots, partially invading into the outer retina, partly confluent lesions of cRORA, foveal sparing, degenerative intraretinal fluid                                                                                        | 328µm/322µm | 9.31mm³/9.00mm³    | mfERG: bilateral amplitudes in normal range, slight relative reduction in the paracentral areas | FA: bilateral dark choroid, mild paracentral dye pooling in the late phase  | Inconspicuous             | N/A                                                            | Clinical examination: pattern-like distribution of the lesions      |
| 025 | STG D | 49 | N/A  | N/A                                                                                                         | 0.05                                           | 0.3                      | N/A           | N/A                                                                                                                                                                                               | N/A                         | OD: Foveolar retinal thinning with intraretinal cysts and questionable retinal pigment epithelial atrophy                                                                                                                                  | 216µm/110µm | 6.79mm³<br>6.99mm³ | /N/A                                                                                            | N/A                                                                         | N/A                       | N/A                                                            | Decrease of VA at the age of 40. Sister has M. Stargardt (020 II.3) |

|         |       |    |        |                                                                                                     |                                          |                                          |                                                       |                                                                                                                                                                                                                    |     |                                                                                                                |               |                   |                                                                                        |                                                                                                              |     |                 |     |
|---------|-------|----|--------|-----------------------------------------------------------------------------------------------------|------------------------------------------|------------------------------------------|-------------------------------------------------------|--------------------------------------------------------------------------------------------------------------------------------------------------------------------------------------------------------------------|-----|----------------------------------------------------------------------------------------------------------------|---------------|-------------------|----------------------------------------------------------------------------------------|--------------------------------------------------------------------------------------------------------------|-----|-----------------|-----|
|         |       |    |        |                                                                                                     |                                          |                                          |                                                       |                                                                                                                                                                                                                    |     | OS: Mild central retinal atrophy with reduced foveolar depression, signs of retinal pigment epithelial atrophy |               |                   |                                                                                        |                                                                                                              |     |                 |     |
| 02511.3 | STG D | 23 | N/A    | N/A                                                                                                 | Date: Value<br>02/87: 0.4<br>08/15: 0.05 | Date: Value<br>02/87: 0.2<br>08/15: 0.05 | Date: Value<br>02/87: 13/15 mmHg<br>08/15: 16/16 mmHg | OD: Central retinal pigment epithelial atrophy, perimacular hyperautofluorescent flecks, dark choroid<br><br>OS: Central retinal pigment epithelial atrophy, perimacular hyperautofluorescent flecks, dark choroid | N/A | OD/OS: Central retinal pigment epithelial and outer retinal atrophy                                            | 257µm / 192µm | 7.12mm³ / 6.96mm³ | N/A                                                                                    | OD/OS: Central retinal pigment epithelial defect, macular hyperfluorescent flecks, late staining, no leakage | N/A | N/A             | N/A |
| 026     | STG D | 16 | severe | Subjective visual impairment since 2013<br><br>visual field: Bilateral central scotoma in year 2016 | Date: Value<br>3/16: 0.16<br>1/16: 0.2p  | Date: Value<br>03/16: 0.2p<br>1/16: 0.2p | 14 mmHg/14 mmHg                                       | OD/OS: Perimacular autofluorescent spots                                                                                                                                                                           | N/A | OD/OS: Central foveal retinal pigment epithelial and retinal atrophy                                           | 20 µm / 61 µm | 7.33mm³ / 7.15mm³ | OD/OS: Dark choroid, foveolar hyperfluorescence with central late staining, no leakage | N/A                                                                                                          | N/A | Central scotoma | N/A |

N/A: Not available.
