# Supplementary material for: High-Throughput Sequencing to Identify Mutations Associated with Retinal Dystrophies
Source: MDPI journal article supplement (doi:10.3390/genes12081269), 2021-08-20
Supplement: s1 [file s1]

## Supplementary Materials

Figure S1. Sanger sequencing and WES results of the patients in this study. f: forward; r: reverse.

Patient 001

Disease-associated gene: NR2E3

001

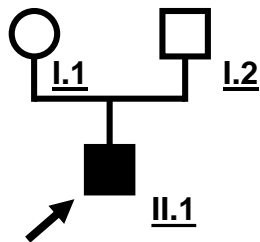

c.119-2A>C

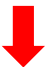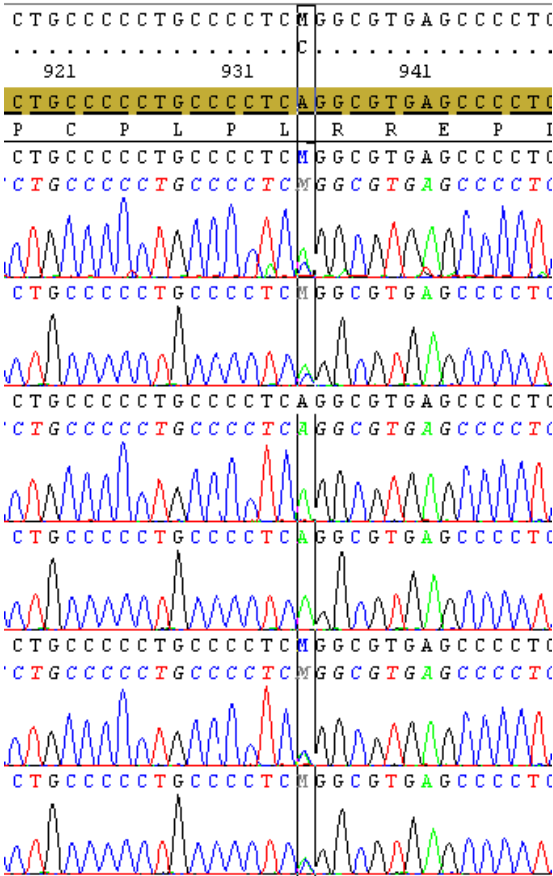

001 II.1 f

001 II.1 r

001 I.1 f

001 I.1 r

001 I.2 f

001 I.2 r

c.1171\_1172delTT

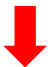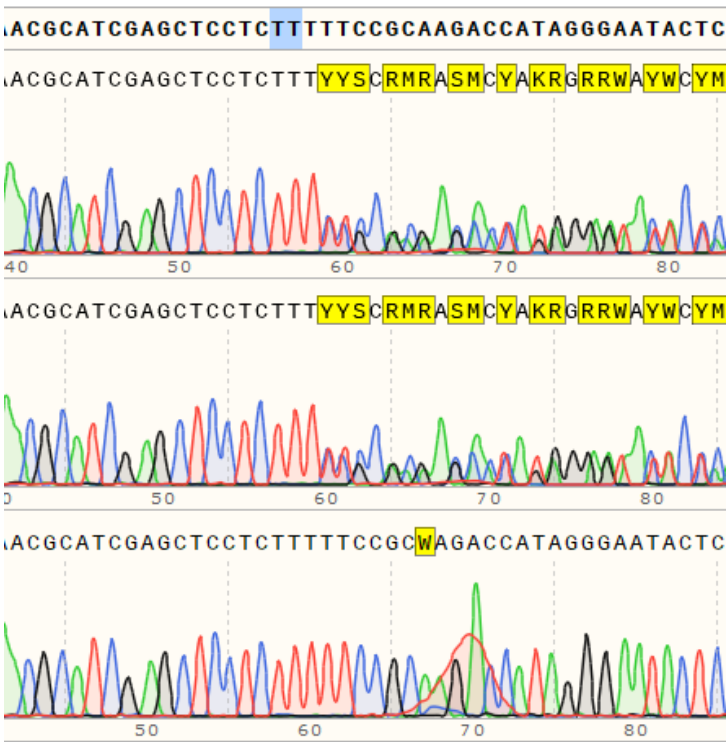

001 I.1 f

001 II.1 f

001 I.2 f

Disease-associated gene: USH2A

c.4714C>T (173x Total Count)

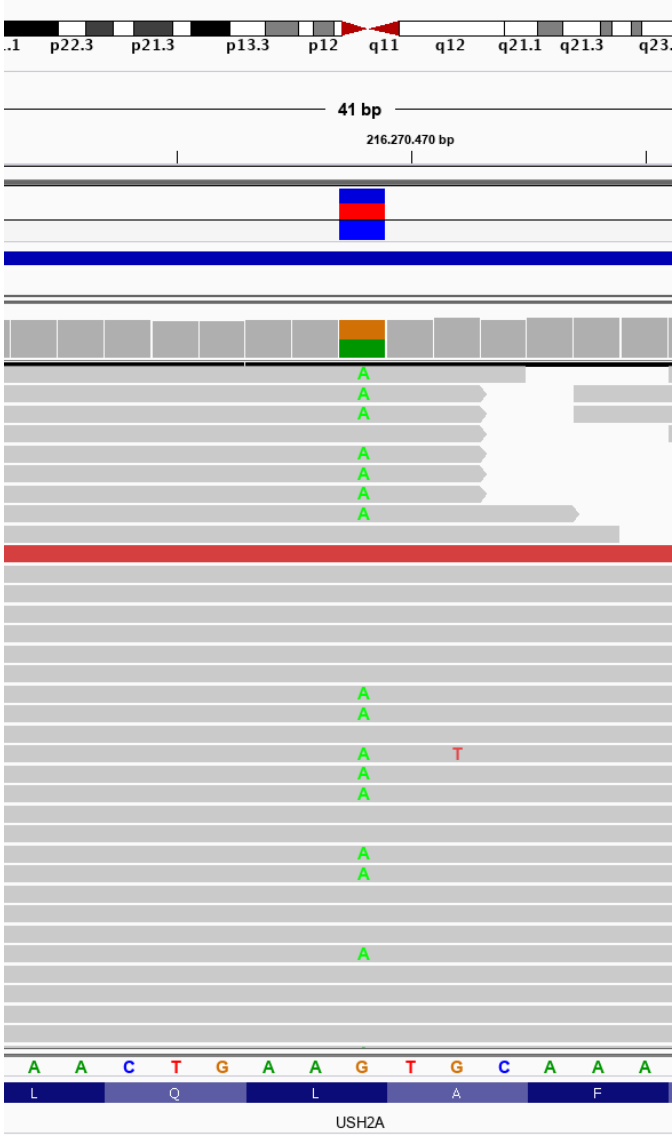

Chromosome  
1

Chromosomal  
Position

NGS  
Reads

c.2299delG (63x Total Count)

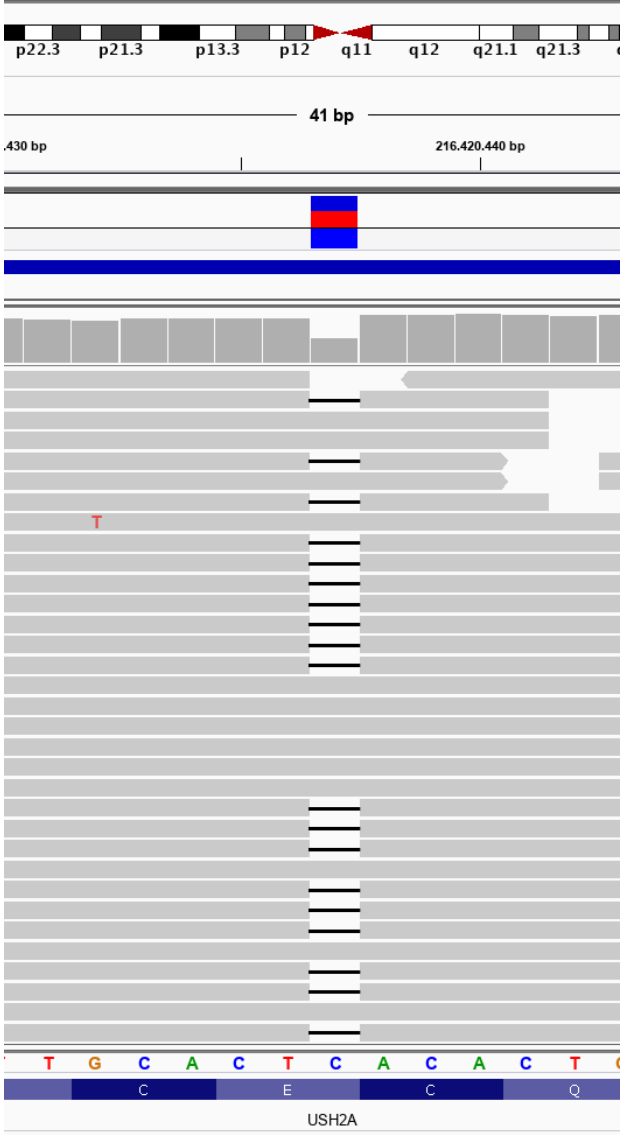

Patient 003

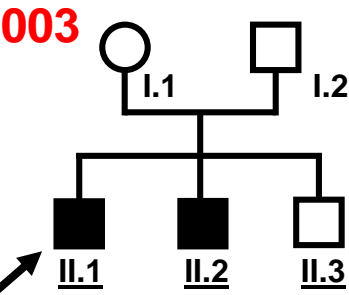

Disease-associated gene: **USH2A**

**c.4714C>T**

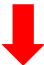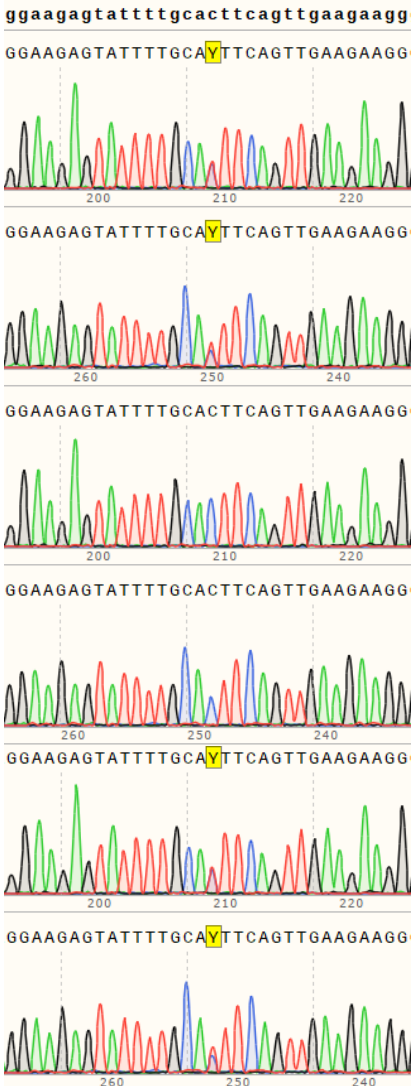

003 II.1 f

003 II.1 r

003 II.3 f

003 II.3 r

003 II.2 f

003 II.2 r

**c.2299delG**

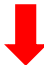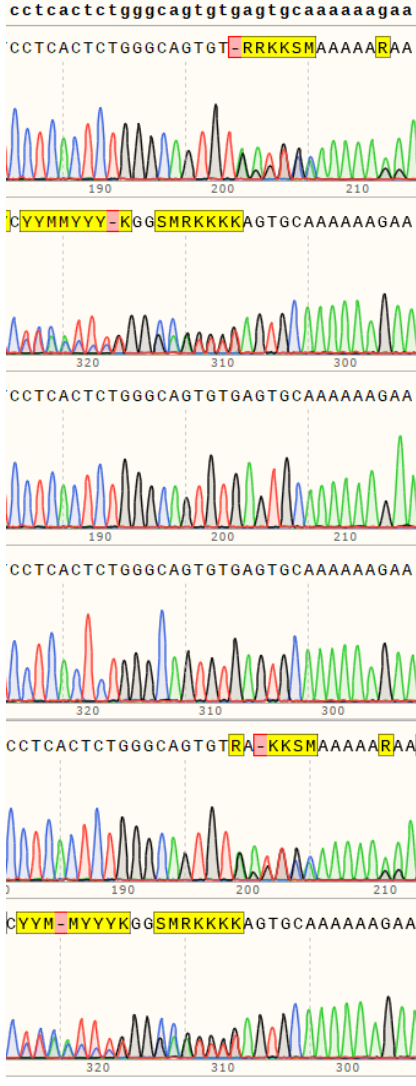

003 II.1 f

003 II.1 r

003 II.3 f

003 II.3 r

003 II.2 f

003 II.2 r

**c.11864G>A**

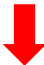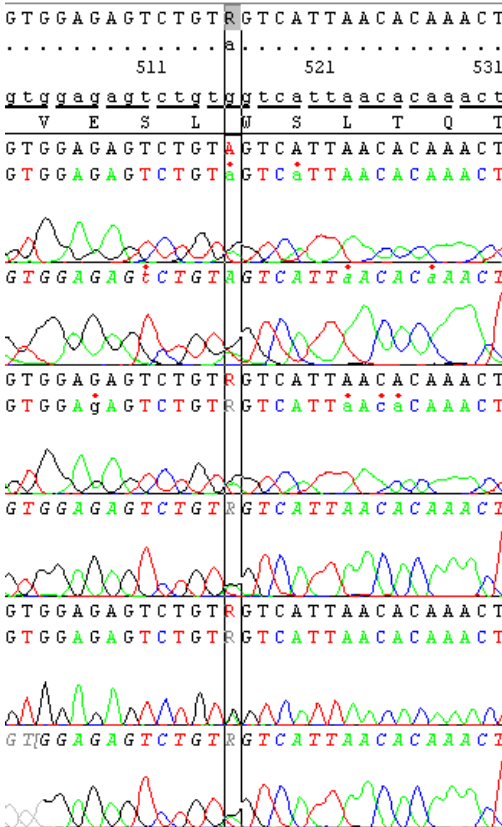

003 II.1 f

003 II.1 r

003 II.3 f

003 II.3 r

003 II.2 f

003 II.2 r

Patient 004

Disease-associated gene: USH2A

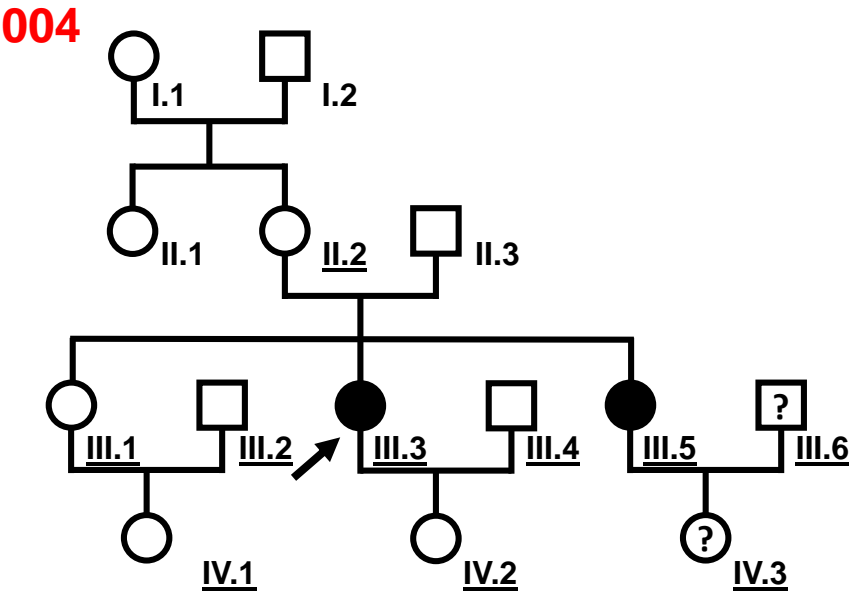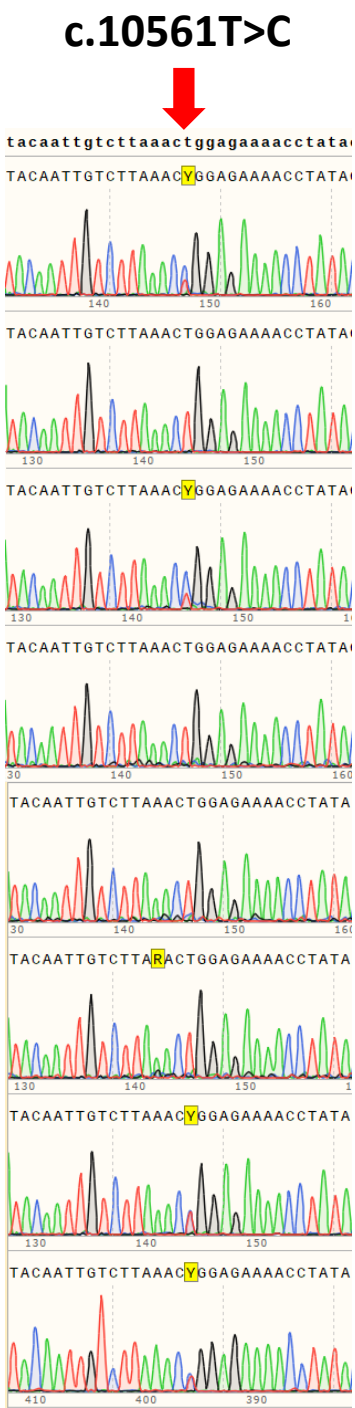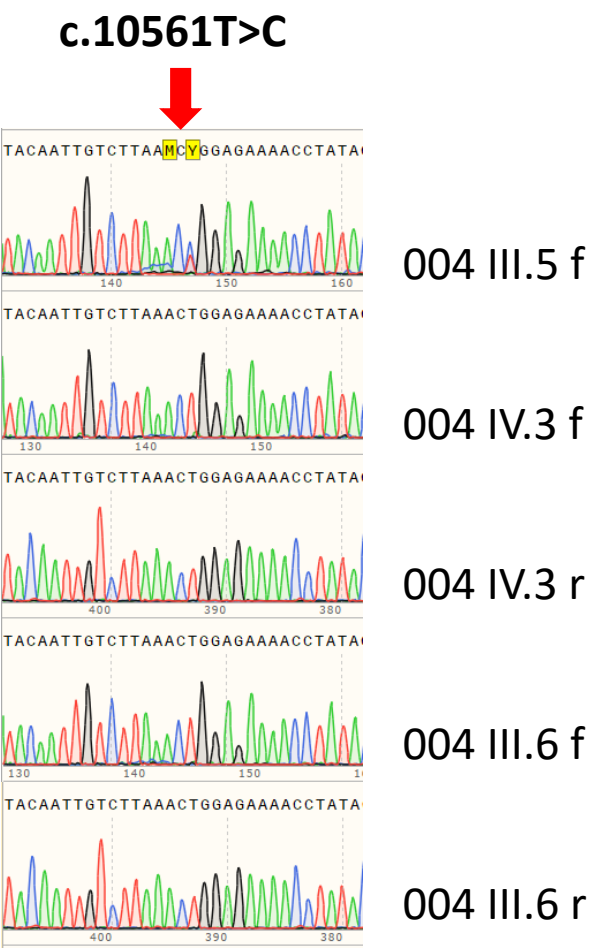

Patient 004

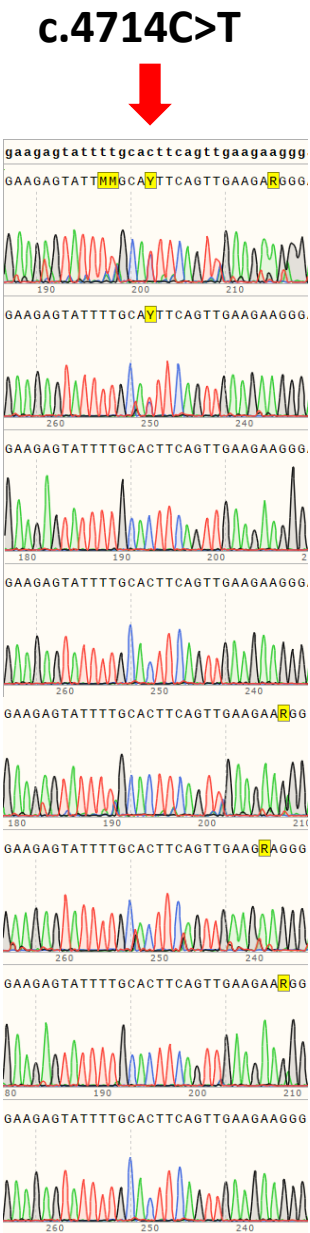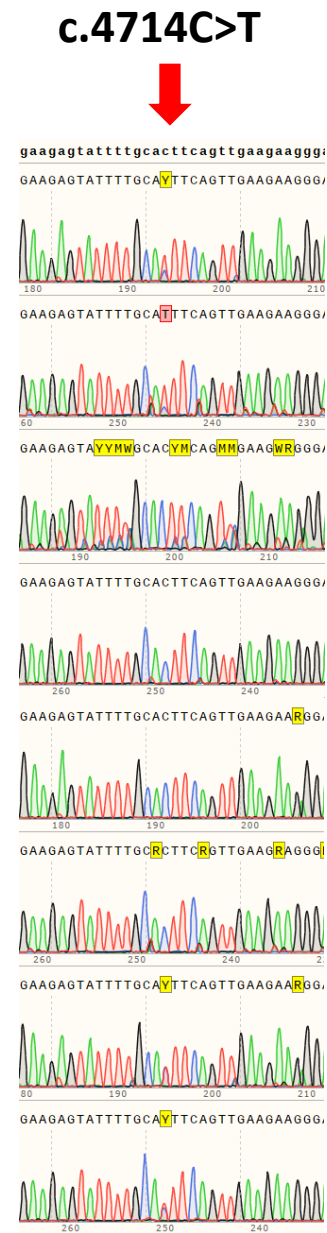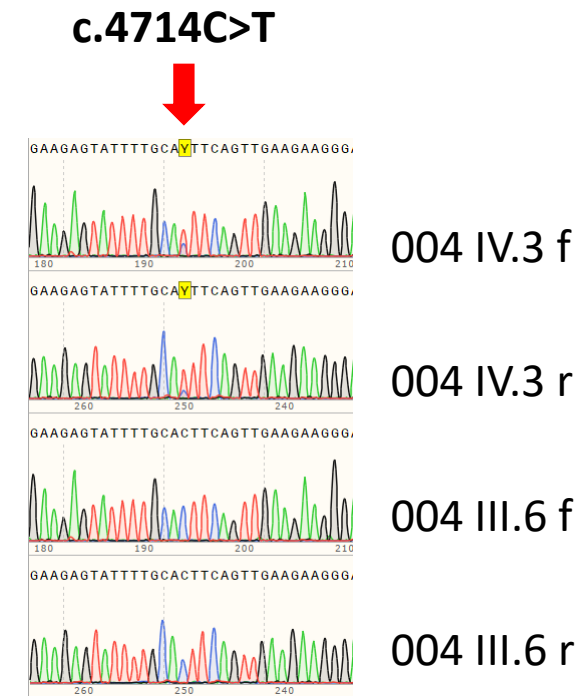

Patient 004

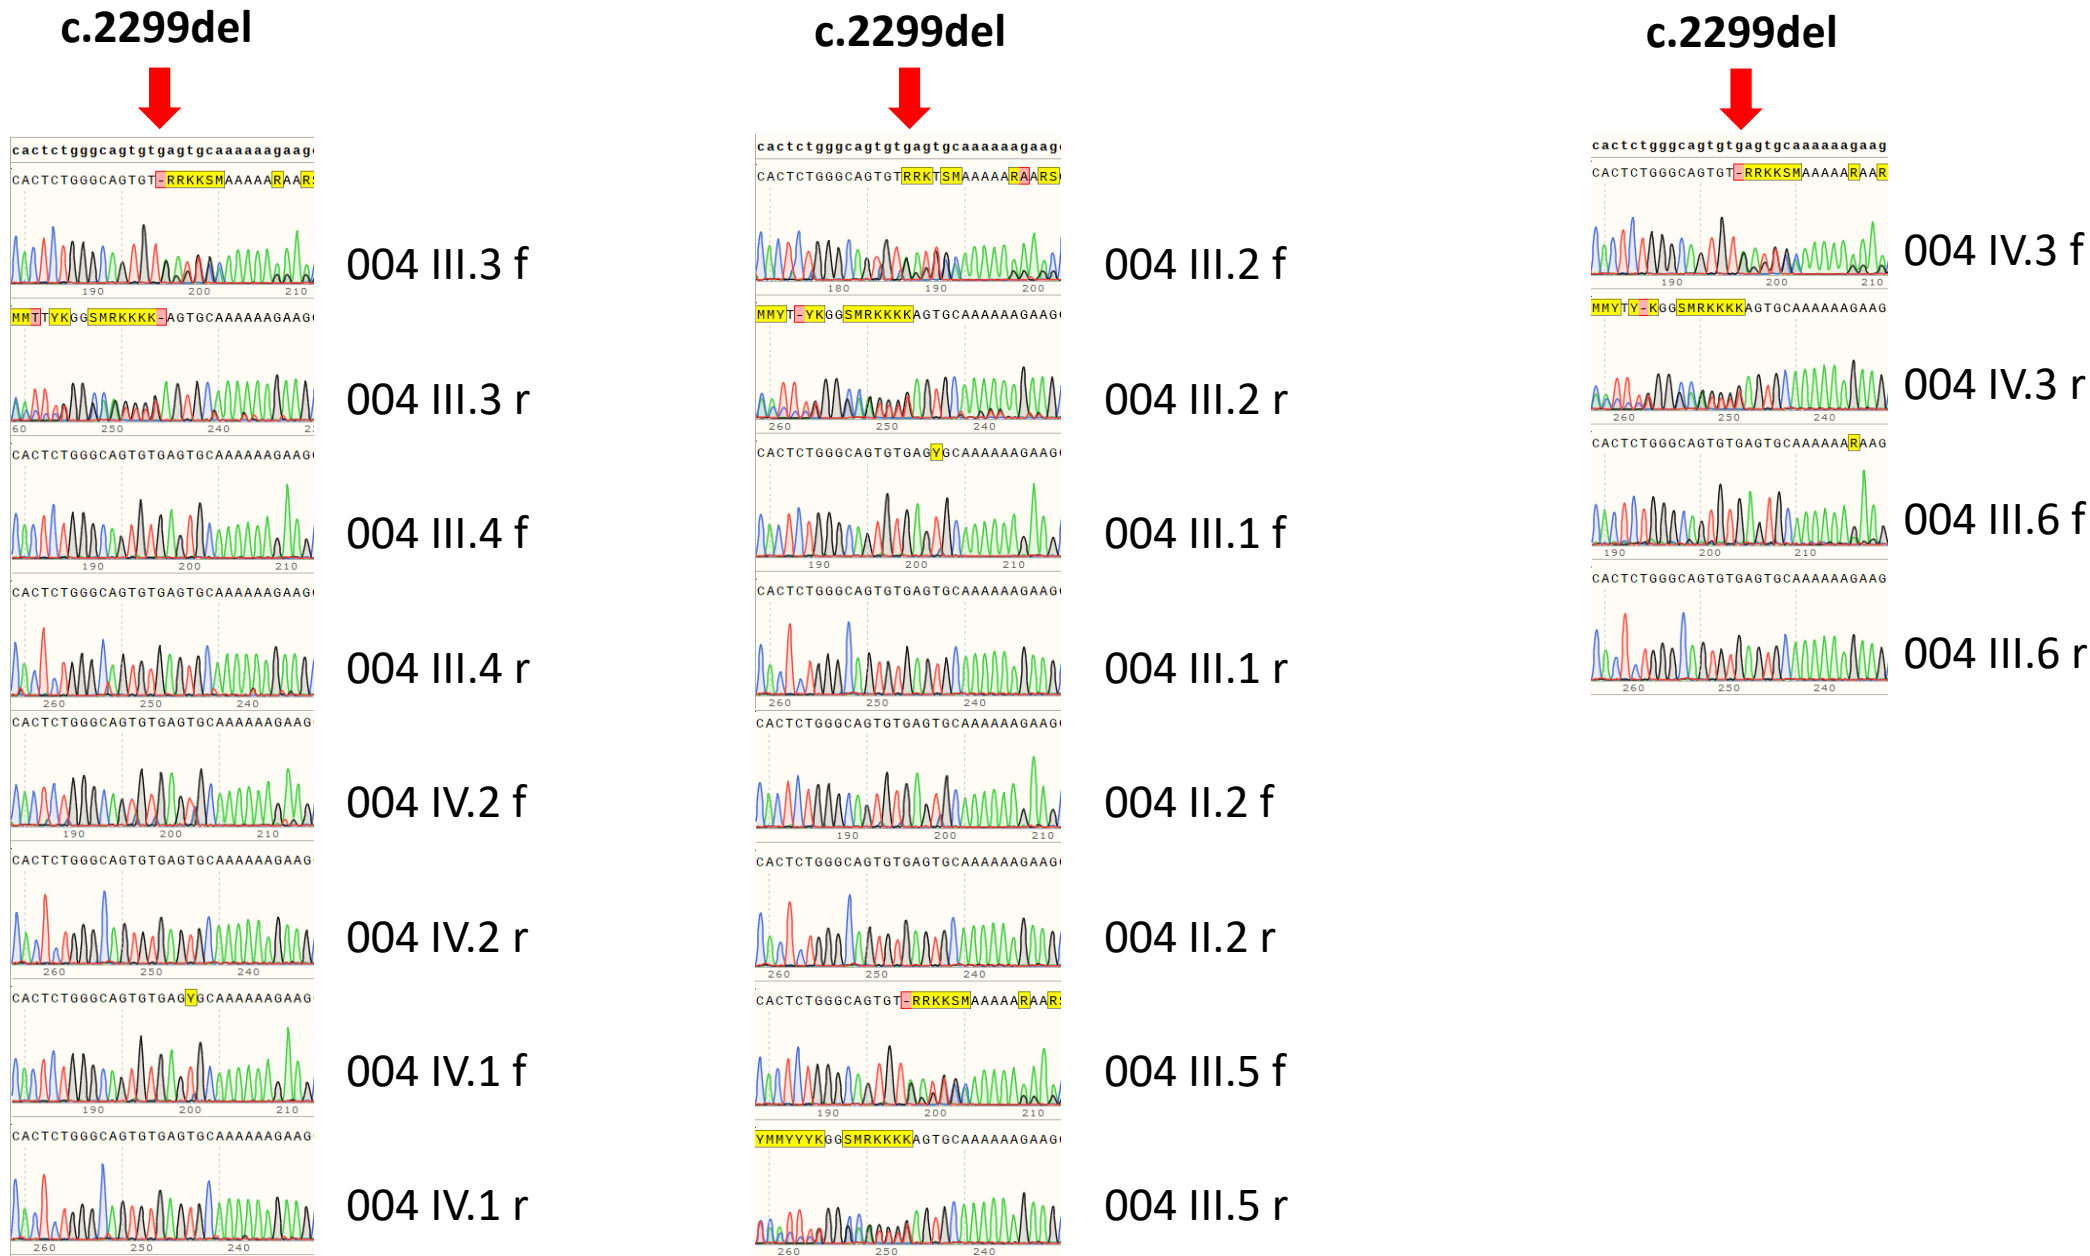



005

I.1 I.2

II.1 II.2 II.3

A Sanger sequencing chromatogram with four color-coded traces (black, red, green, blue) representing different nucleotides. The top of the image shows a sequence alignment with amino acid codes (R, S, A, C, S, W, R, K, W, S, G, K, V, W, S, V, S, R) and their corresponding positions (180, 190, 200). A large red arrow points down to a blue shaded rectangular region covering the sequence from position 180 to 200. The chromatogram shows multiple overlapping peaks, indicating a complex sequence or a mixture of samples.

[illegible]

**c.2655delT**

GGGCTTCCCCAAAGCTGAGGGCCTCKKRRS CCCCCKGRMCTTGCTGCCCA  
201 211 221 231 241  
**GGGCTTCCCCAAAGCTGAGGGCCTCTGTGAGCCCTTGGA**CTTGCTGCCA  
G L P Q S \* G P L \* A P W T C C P  
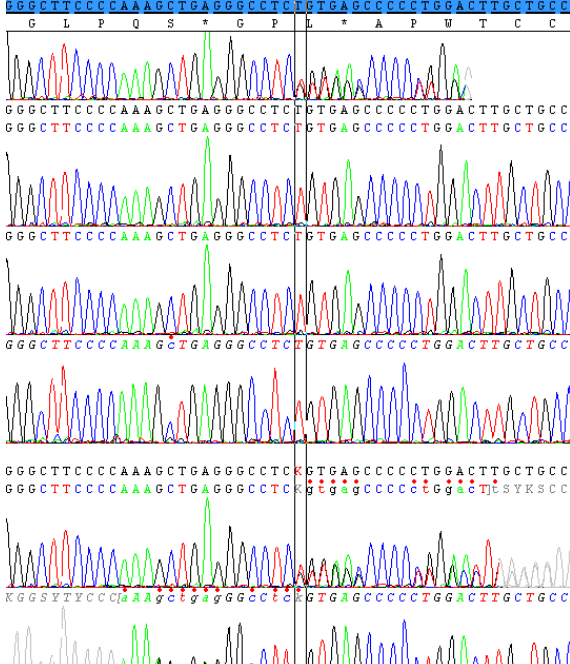  
GGGCTTCCCCAAAGCTGAGGGCCTCTGTGAGCCCTTGGA

005 1.2 f

003 1.2 1

005 1.2 r

005 I.1 f

005 l.1 r

005 1.1 f



Disease-associated gene: RP1L1

c.3514C>A (85x Total Count)

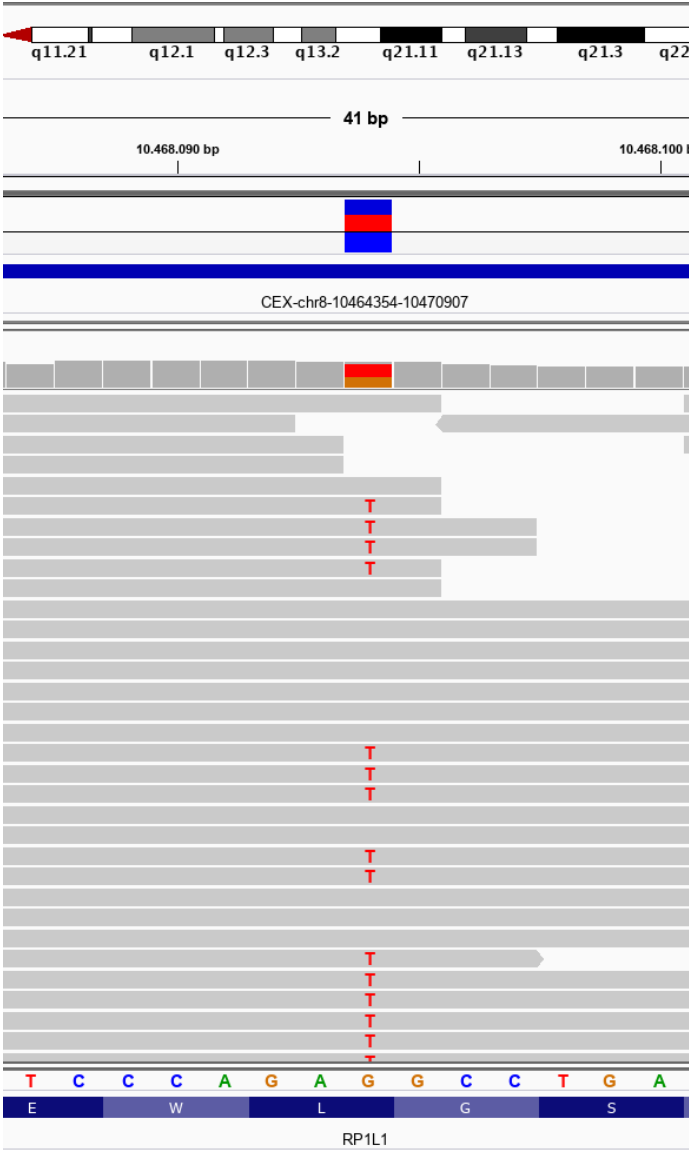

Chromosome  
8

Chromosomal  
Position

NGS  
Reads

c.130C>G (53x Total Count)

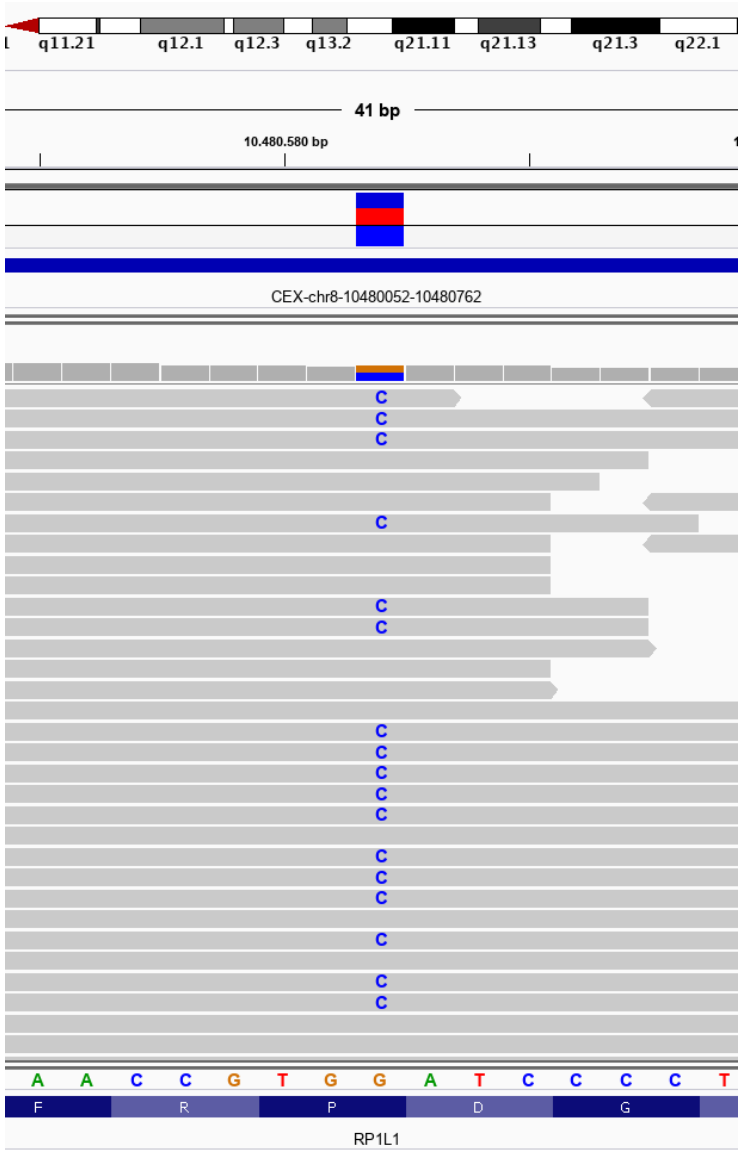

Patient 007

Disease-associated gene: RP1L1

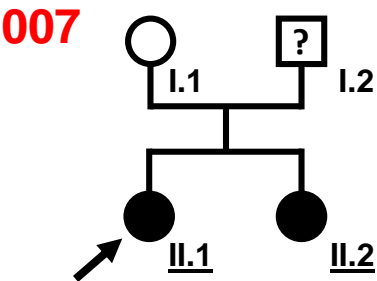

c.133C>T

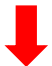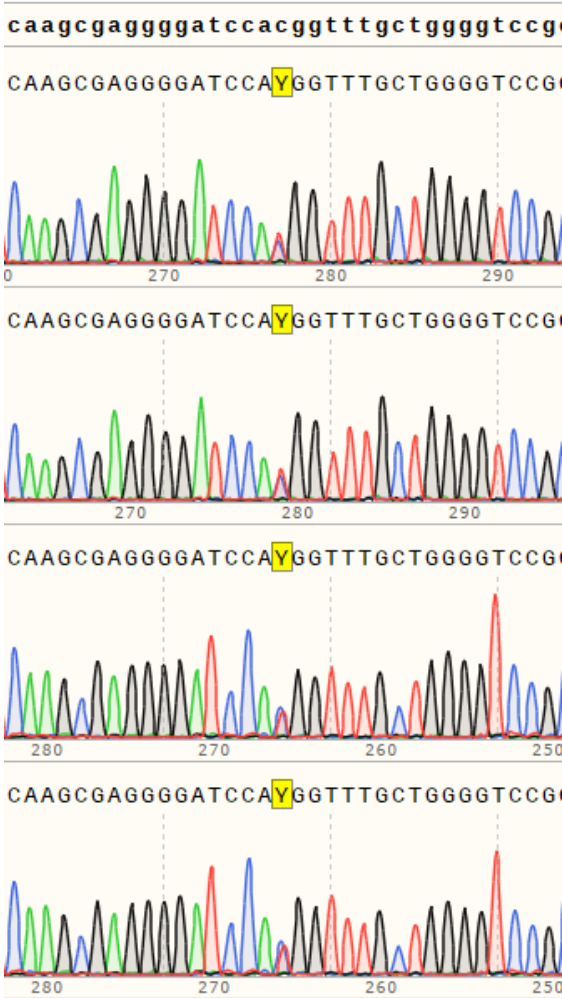

c.133C>T

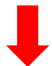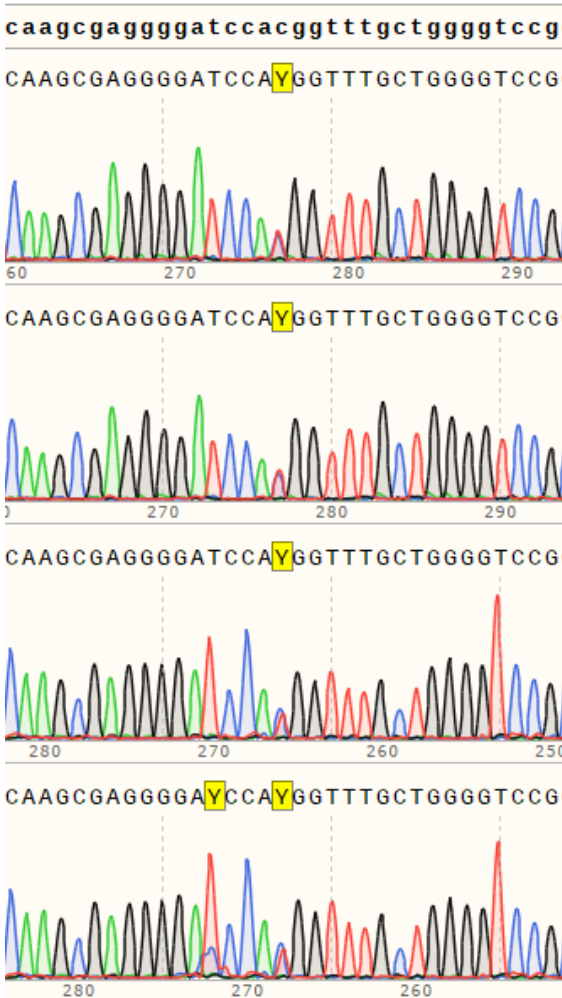

c.1919C>A (26x Total Count)

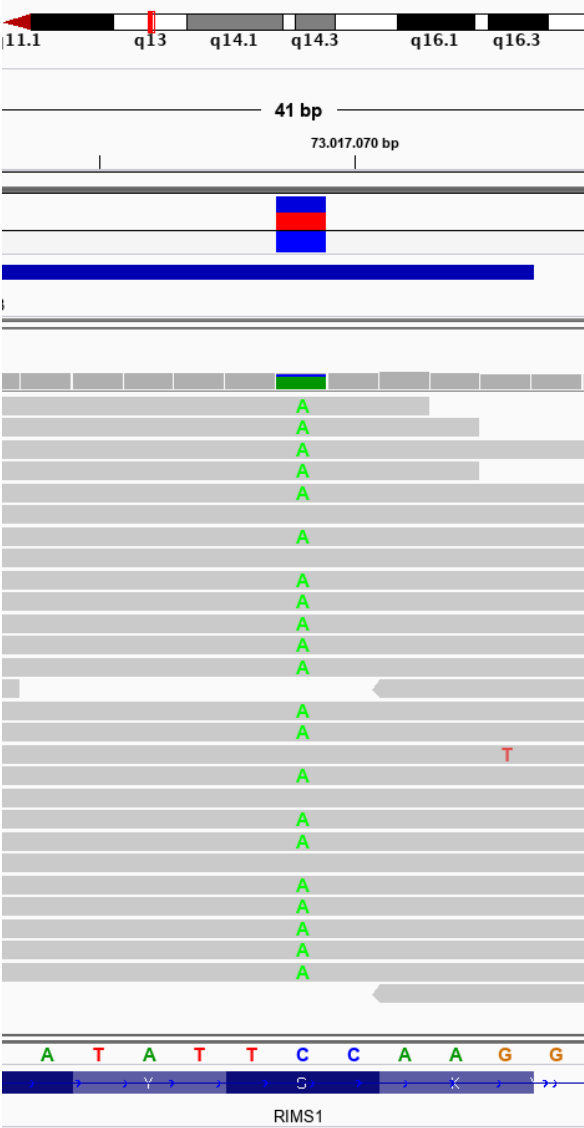

c.1919C>A

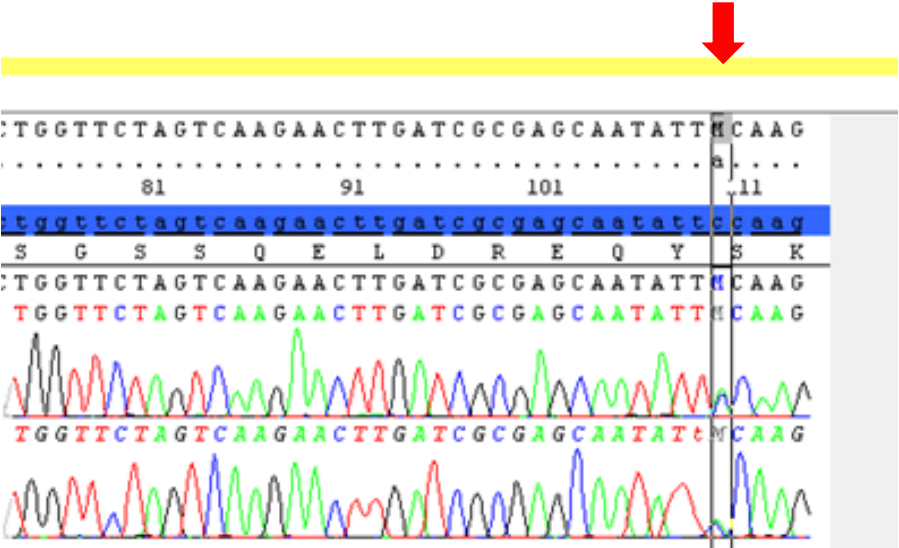

008 f

008 r

## Chromosome 5

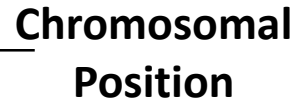

**c.607T>A**

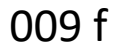

009 f

009 r

009 r

Patient 010

Disease-associated gene: RP1

c.5957G>A (96x Total Count)

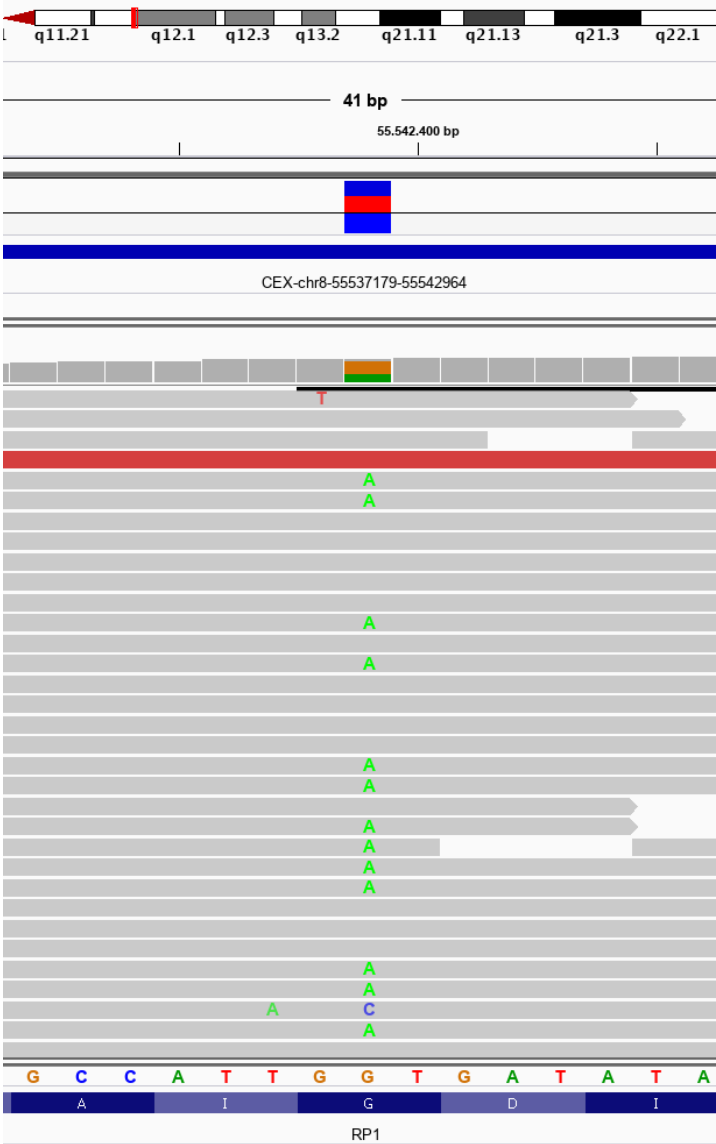

Chromosome  
8

Chromosomal  
Position

NGS  
Reads

c.5957G>A

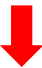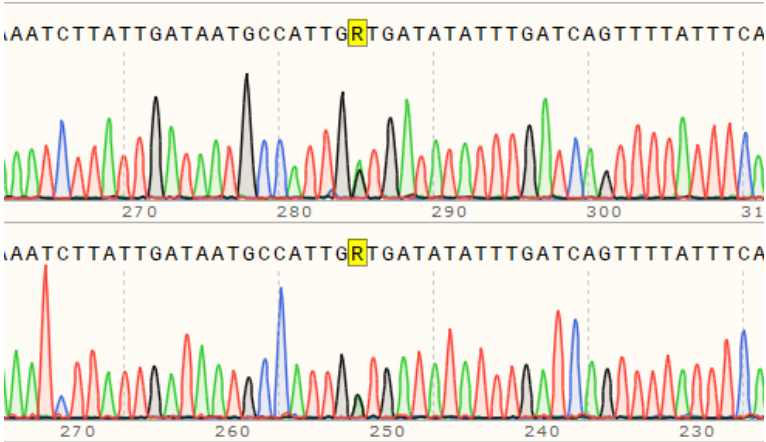

010 f

010 r

Patient 014

Disease-associated gene: **PROM1**

014

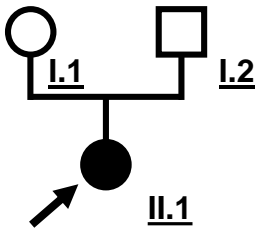

c.1069G>C

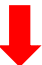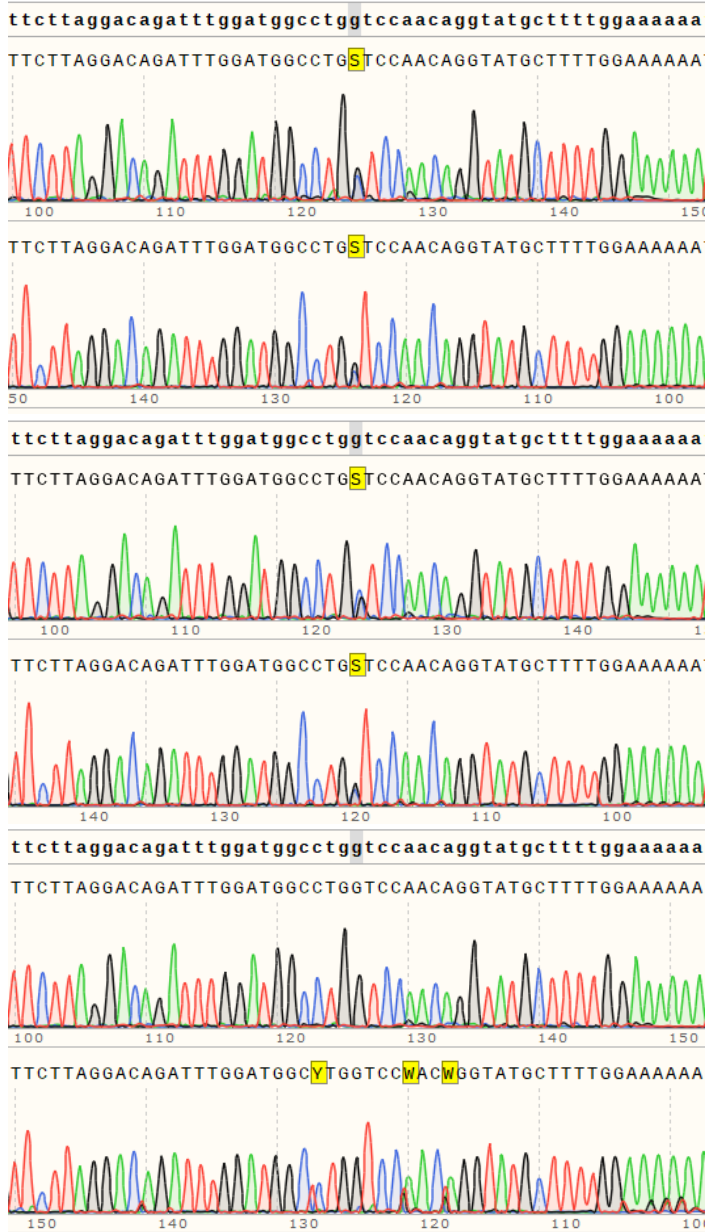

Disease-associated gene: SNRNP200

c.3260C>T (96x Total Count)

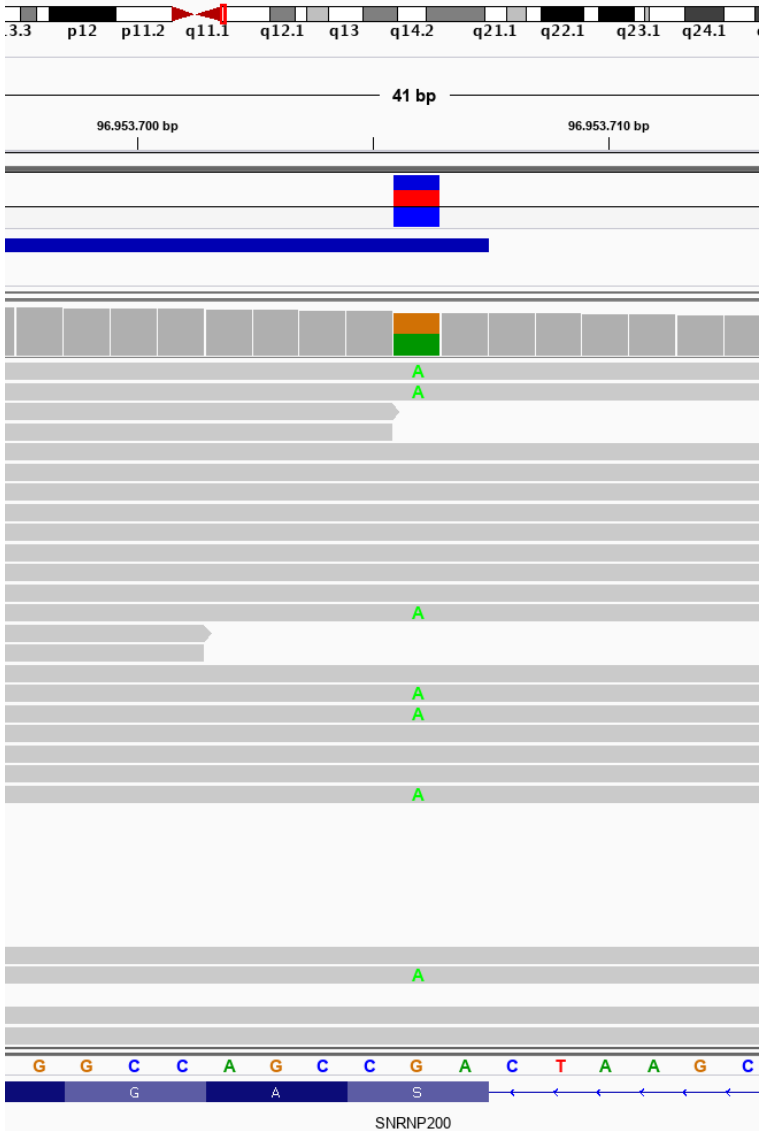

Chromosome  
2

Chromosomal  
Position

NGS  
Reads



c.1154C>T (152x Total Count)

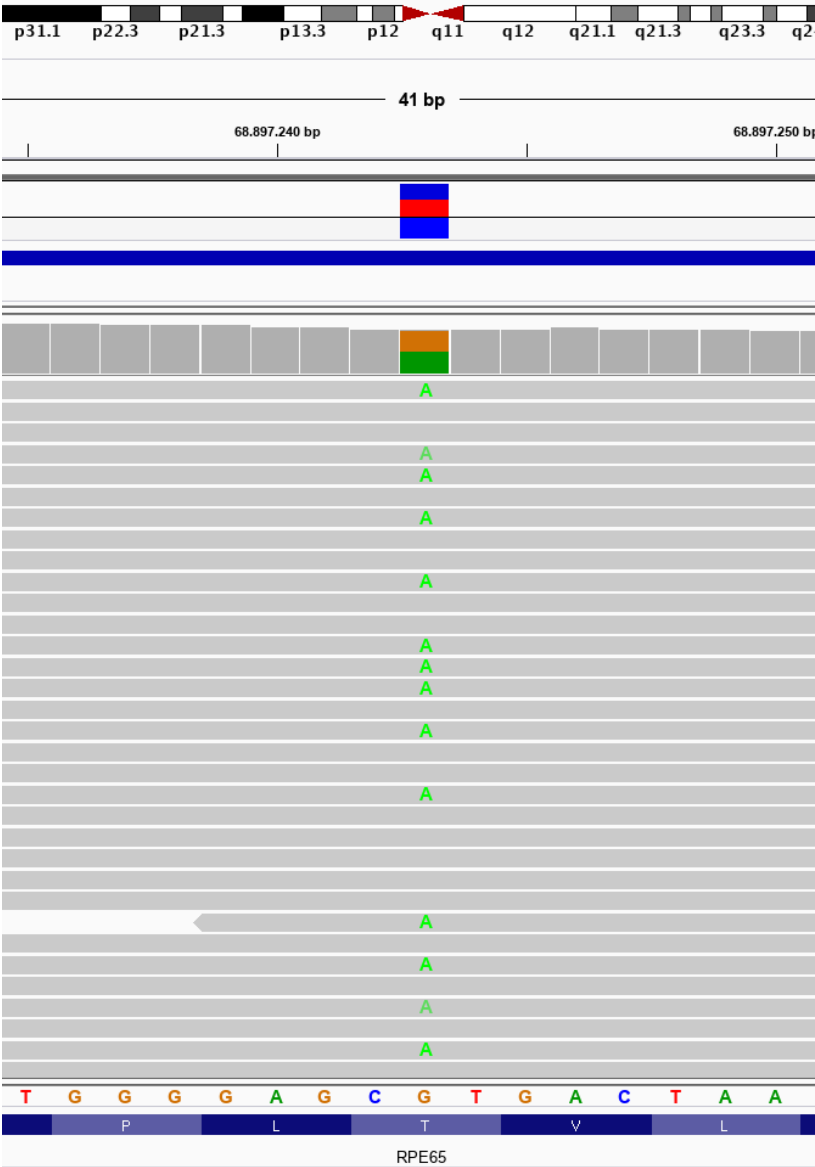

Chromosome  
1

Chromosomal  
Position

NGS  
Reads

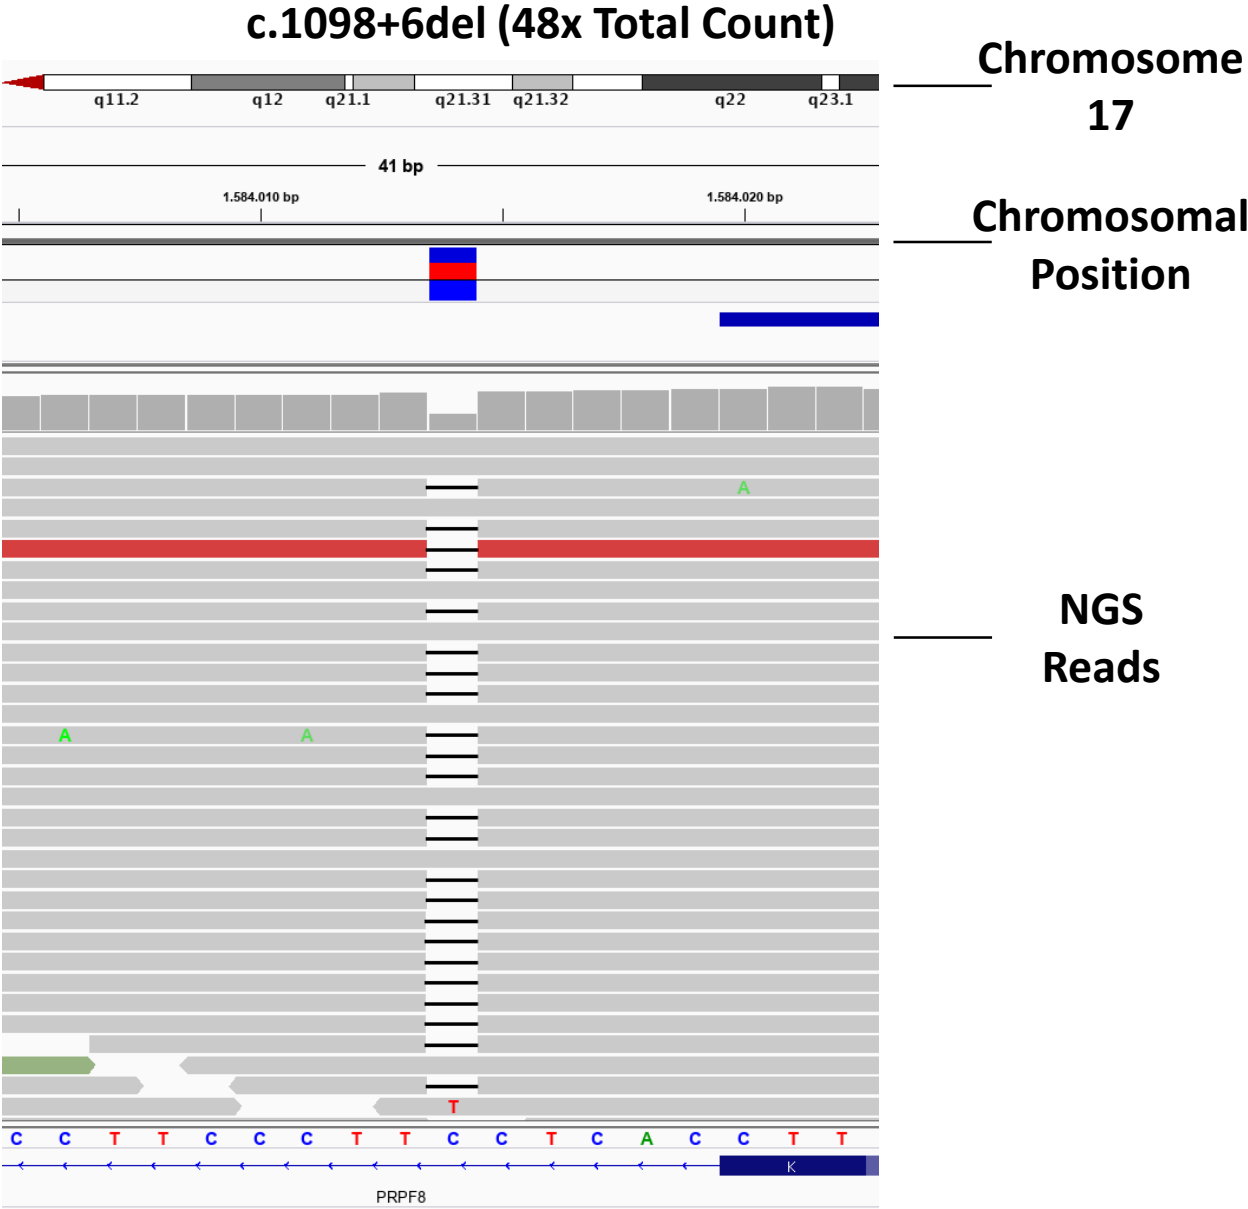

c.1310C>T (50x Total Count)

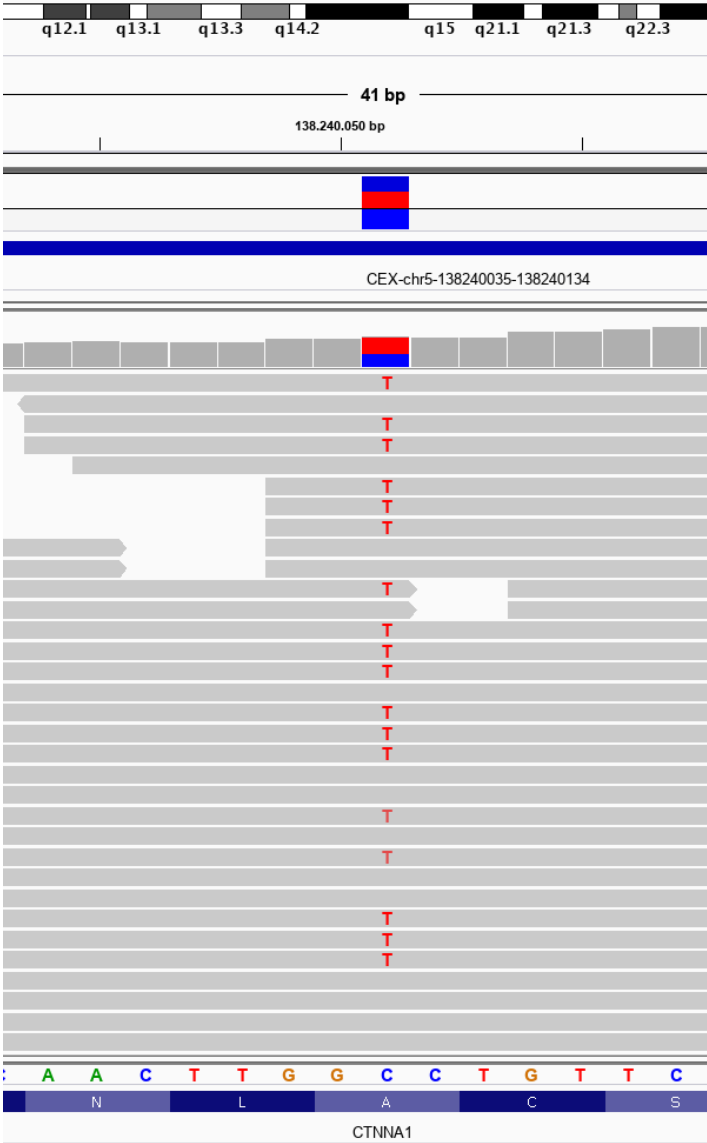

Chromosome  
5

Chromosomal  
Position

NGS  
Reads

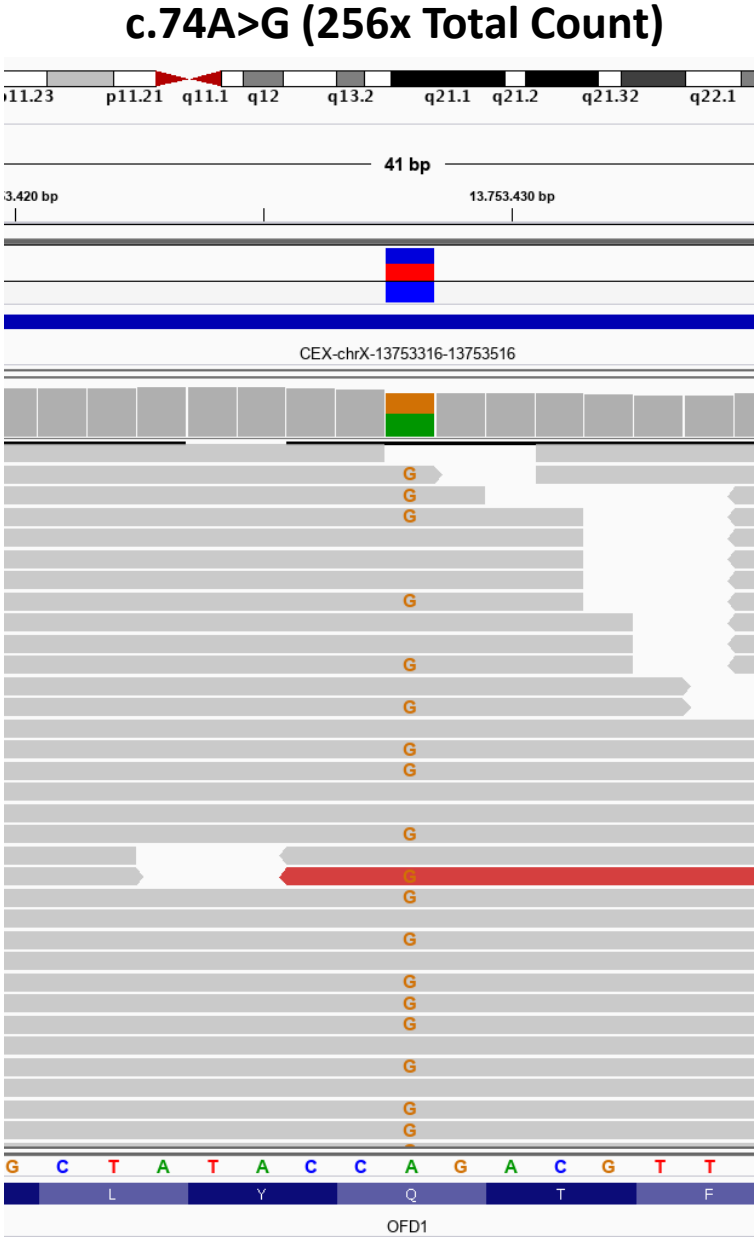

Patient 022

Disease-associated gene: ABCA4

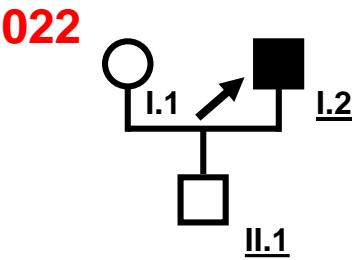

c.5882G>A

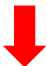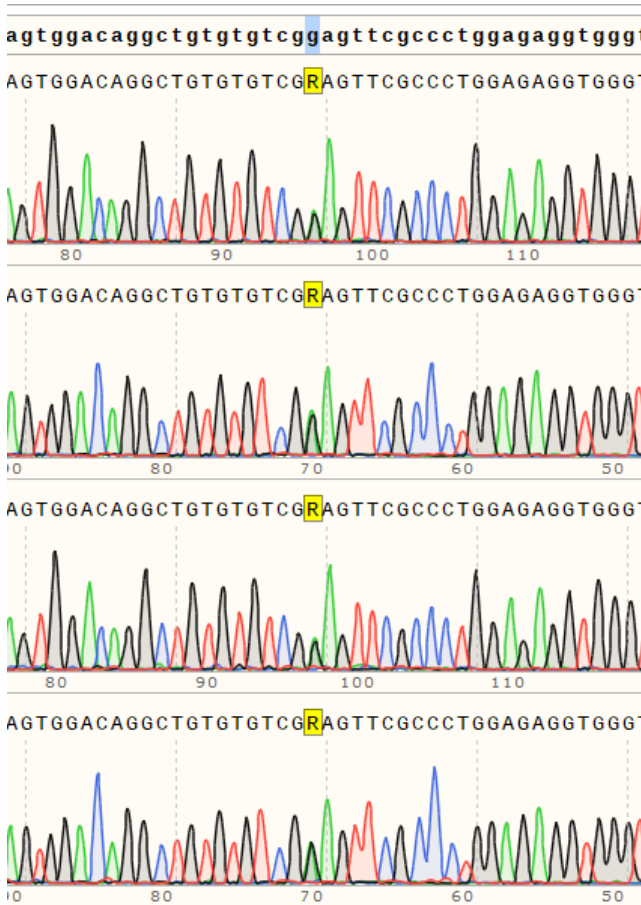

c.3113C>T

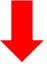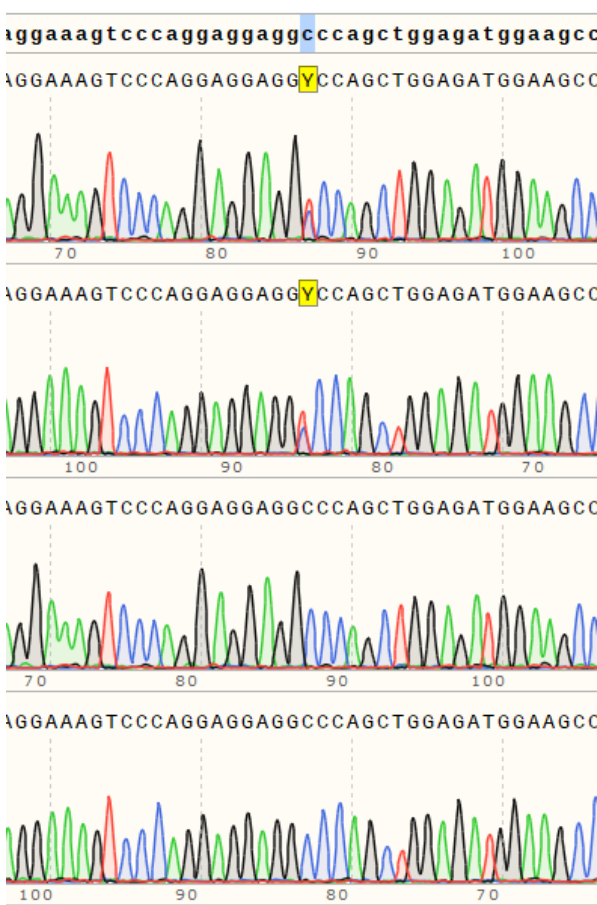

Patient 022

Disease-associated gene: ABCA4



c.1622T>C

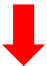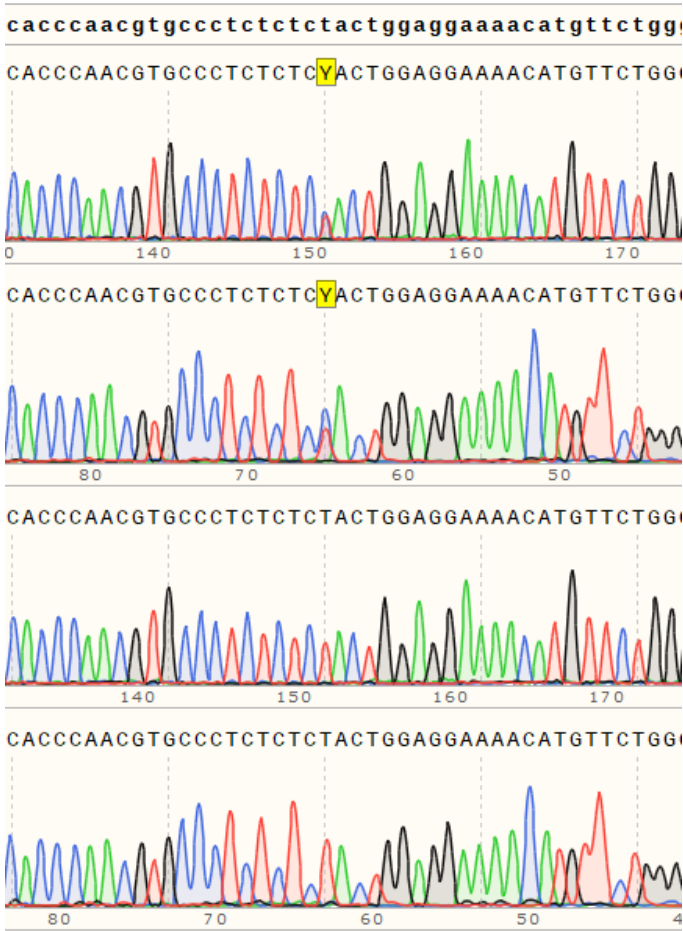

022 I.2 f

022 I.2 r

022 II.1 f

022 II.1 r

c.6006-5T>G

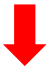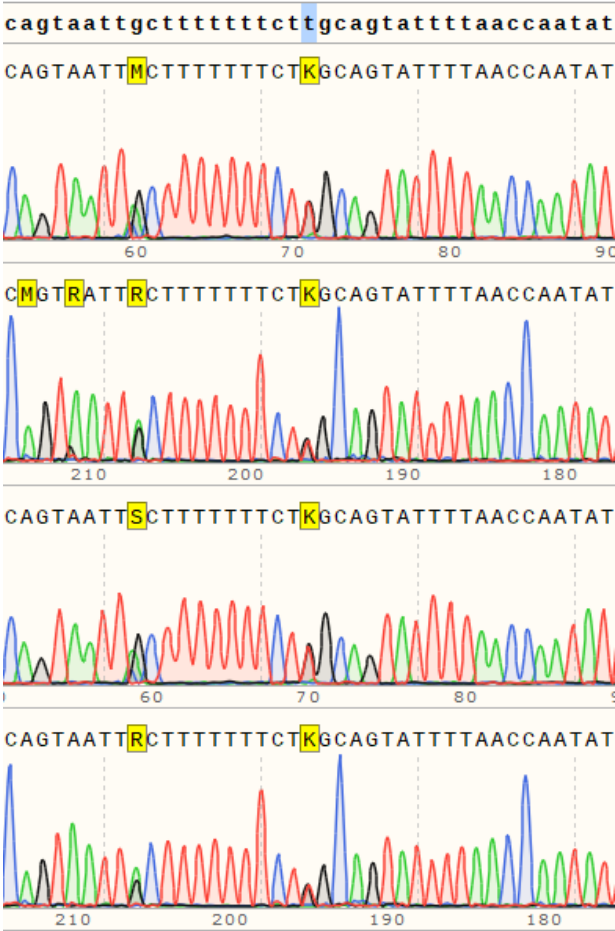

022 I.2 f

022 I.2 r

022 II.1 f

022 II.1 r

Patient 023

Disease-associated gene: ABCA4

c.4539+1770C>A

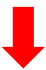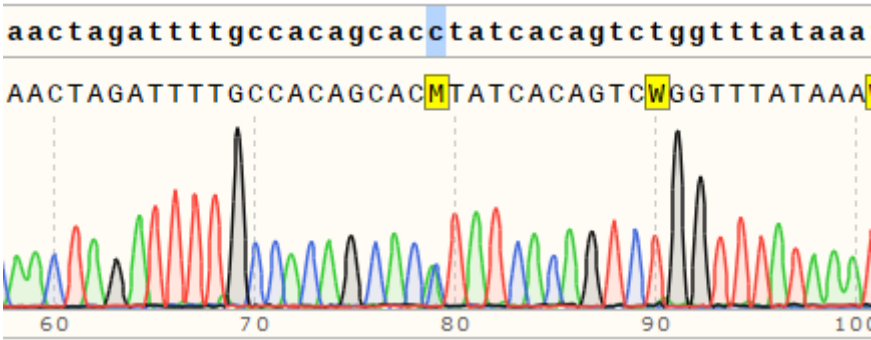

023 f

c.5196+1015A>G

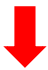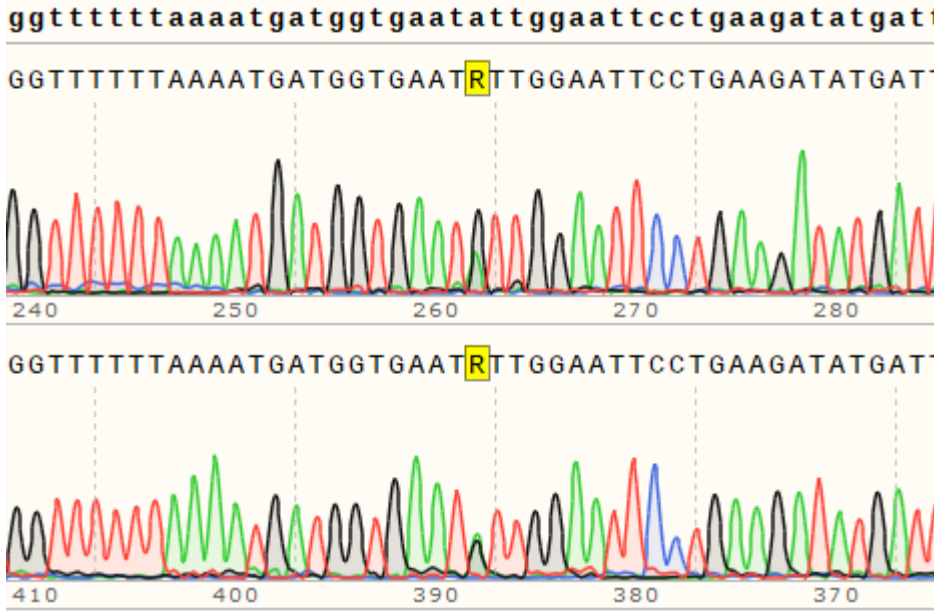

023 f

023 r



Patient 024

Disease-associated gene: ABCA4

c.4253+43G>A

c.6601\_6602delAG

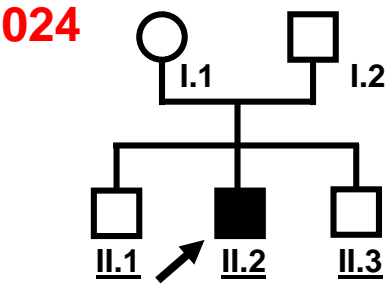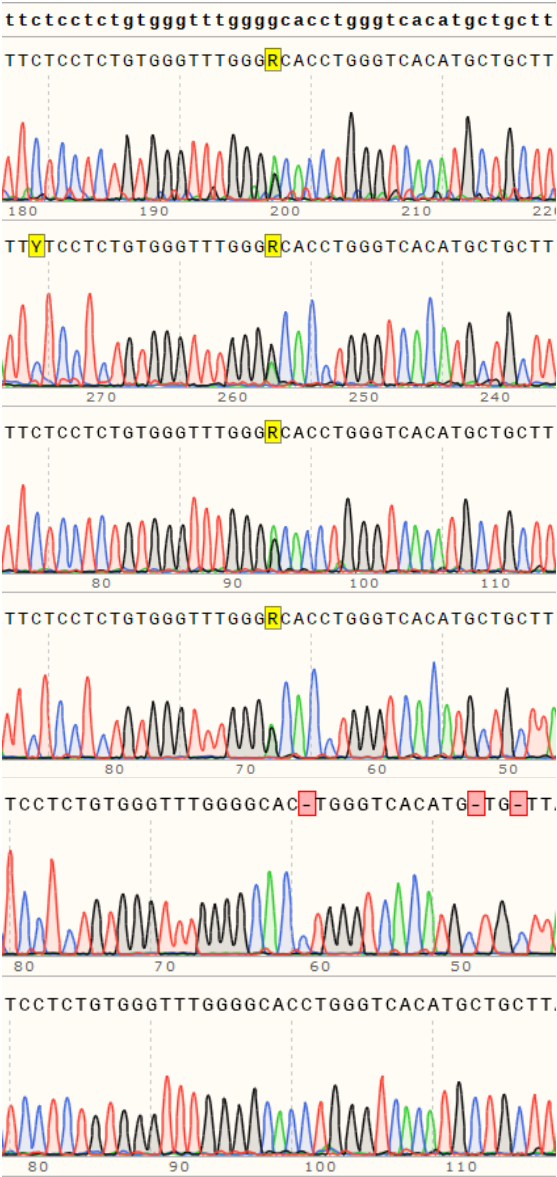

024 II.2 f

024 II.2 r

024 II.1 f

024 II.1 r

024 II.3 r

024 II.3 f

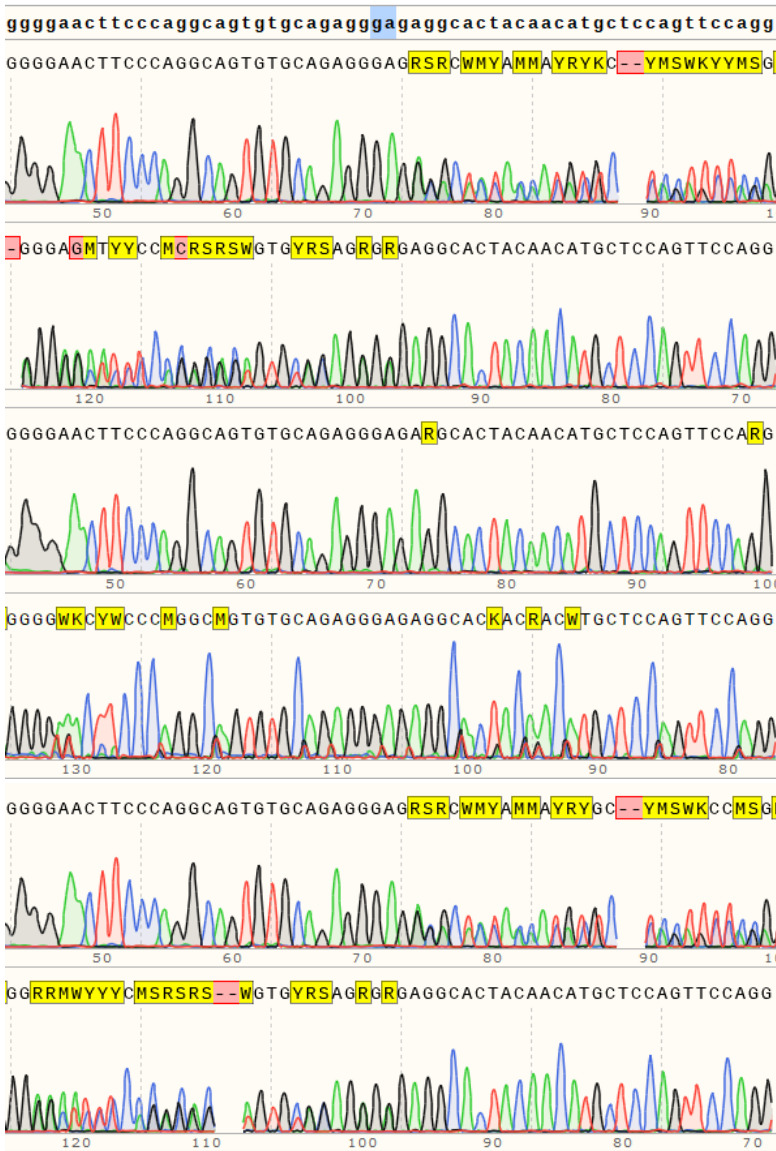

024 II.2 f

024 II.2 r

024 II.1 f

024 II.1 r

024 II.3 f

024 II.3 r

Patient 025

Disease-associated gene: ABCA4

025

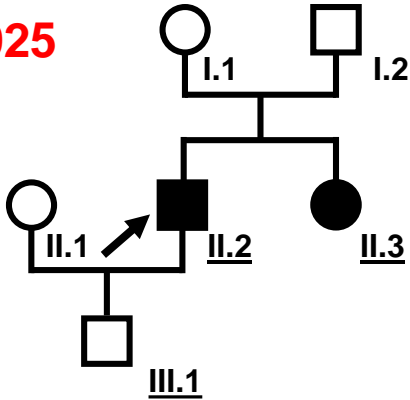

c.3113C>T

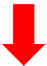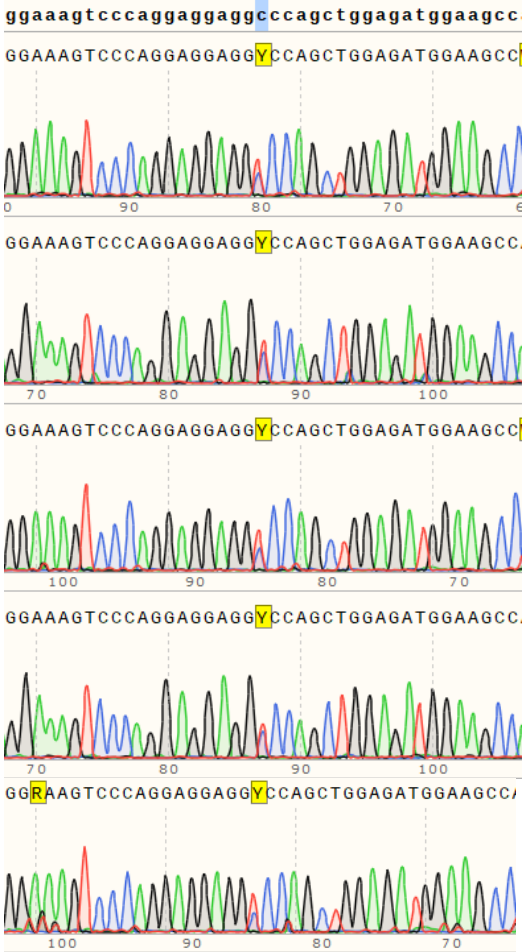

025 II.2 r

025 II.3 f

025 II.3 r

025 III.1 f

025 III.1 r

c.6118C>T

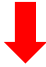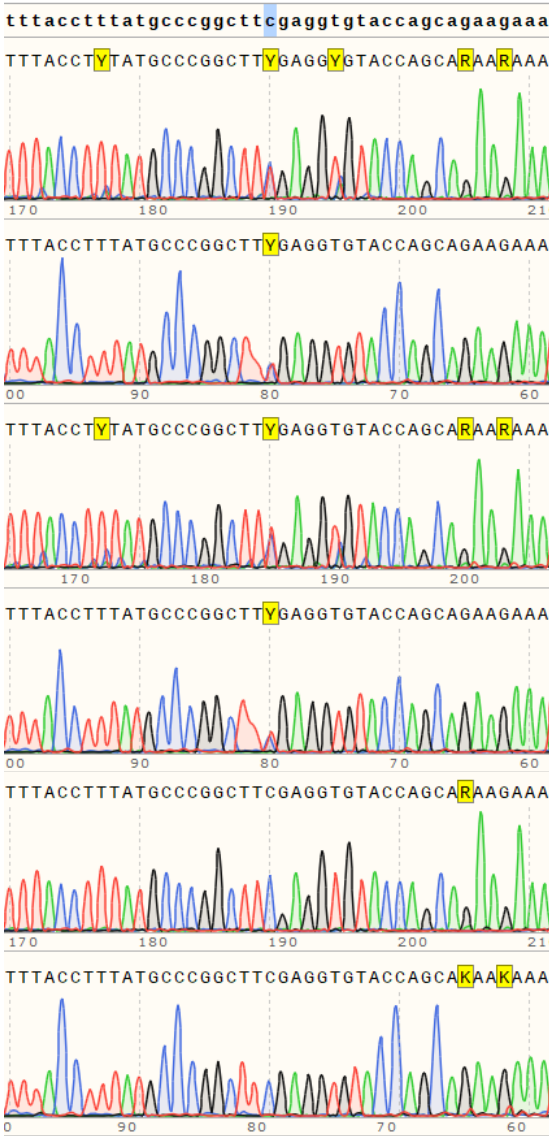

025 II.2 f

025 II.2 r

025 II.3 f

025 II.3 r

025 III.1 f

025 III.1 r
